# Supplementary material
Source: publisher figshare collection journal article supplement (https://acs.figshare.com/ndownloader/files/20547450)
Supplement: Supplementary file 1 [file 20547450]

# Supporting Information

## Formation of Au/Au<sub>9</sub>Ga<sub>4</sub> Alloy Nanoshell on Bacterial Surface through Galvanic

## Displacement Reaction for High-Contrast Imaging

Amanpreet Singh,<sup>a</sup> Deepak Bains,<sup>b</sup> Walid M. Hassen,<sup>a</sup> Narinder Singh,<sup>b,\*</sup> Jan J. Dubowski<sup>a,\*</sup>

<sup>a</sup>Laboratory for Quantum Semiconductors and Photon-Based BioNanotechnology, Interdisciplinary Institute for Technological Innovation (3IT), CNRS UMI-3463, Department of Electrical and Computer Engineering, Université de Sherbrooke, 3000 boul. de l'Université, Sherbrooke, Québec J1K 0A5, Canada

<sup>b</sup>Department of Chemistry, Indian Institute Technology Ropar, Punjab, 140001, India

Corresponding authors:      *Prof. Jan J. Dubowski, Email: jan.j.dubowski@usherbrooke.ca*  
                                         *Prof. Narinder Singh, Email: nsingh@iitrpr.ac.in*



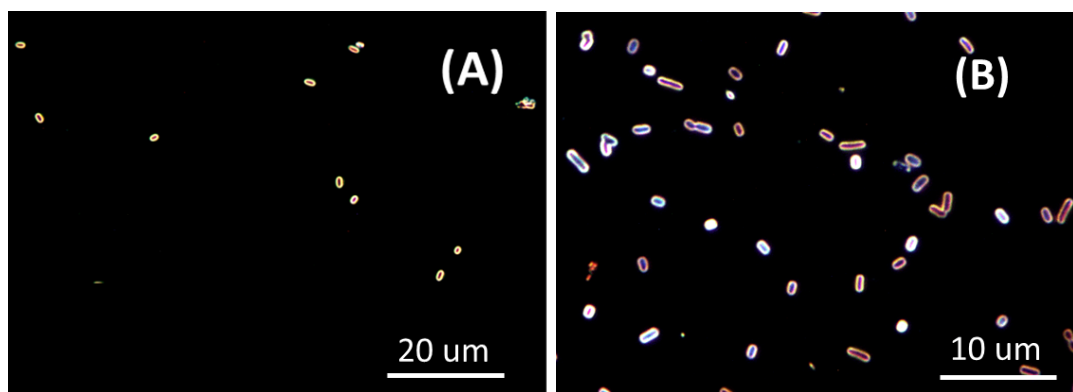

**Figure S2:** Optical microscopy images of (a) a non-functionalized chip exposed to  $10^6$  CFU/ml of gold coated *E. coli*, and (b) an antibody-functionalized chip exposed to  $10^6$  CFU/ml of gold coated *E. coli*.

**Table 1:** Zeta potentials of *E. coli* before and after treatment in gold ionic liquid.

| Sample                                                              | Zeta potentials (mV) |
|---------------------------------------------------------------------|----------------------|
| <i>E.coli</i>                                                       | $-51.6 \pm 1.5$      |
| <i>E.coli</i> + I.L. 1a + AuCl <sub>3</sub> (1mM for $10^9$ CFU/mL) | $-41.0 \pm 1.1$      |
| <i>E.coli</i> + I.L. 1a + AuCl <sub>3</sub> (2mM for $10^9$ CFU/mL) | $-30.6 \pm 1.3$      |
| <i>E.coli</i> + I.L. 1b + AuCl <sub>3</sub> (1mM for $10^9$ CFU/mL) | $-43.0 \pm 1.5$      |
| <i>E.coli</i> + I.L. 1b + AuCl <sub>3</sub> (2mM for $10^9$ CFU/mL) | $-34.2 \pm 1.4$      |

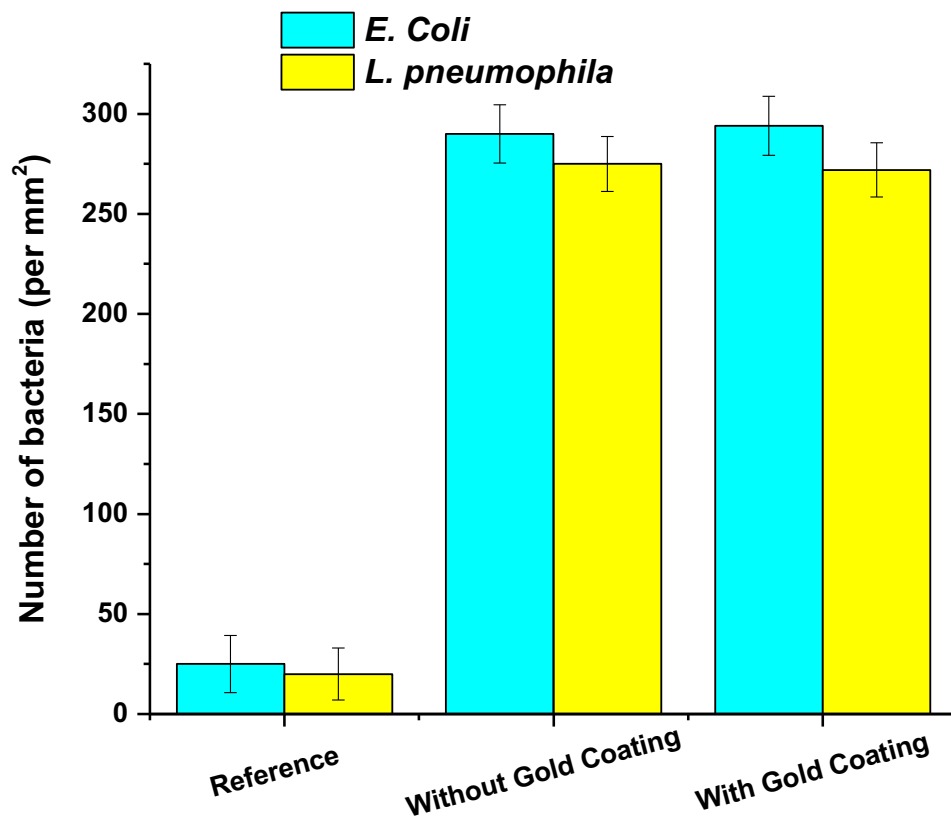

**Figure S3:** Comparison of bacteria capturing tendency of specific Ab functionalized samples exposed for 1 hour to respective bacteria in PBS at  $10^5$  CFU/mL. The “Reference” corresponds to a non functionalized GaAs surface.

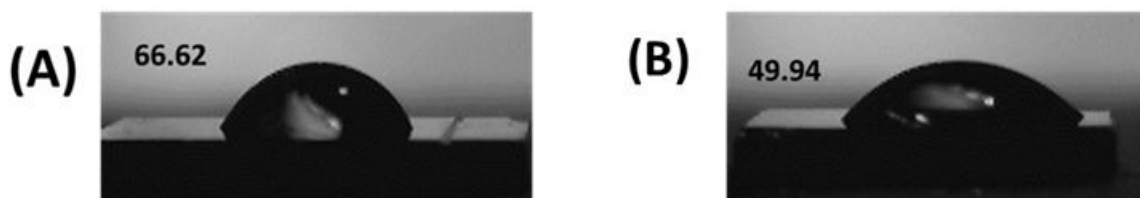

**Figure S4:** Contact angle measurements of the GaAs substrate exposed to  $10^8$  CFU/mL of (a) *L. pneumophila* bacteria, (b) gold functionalized *L. pneumophila* bacteria.

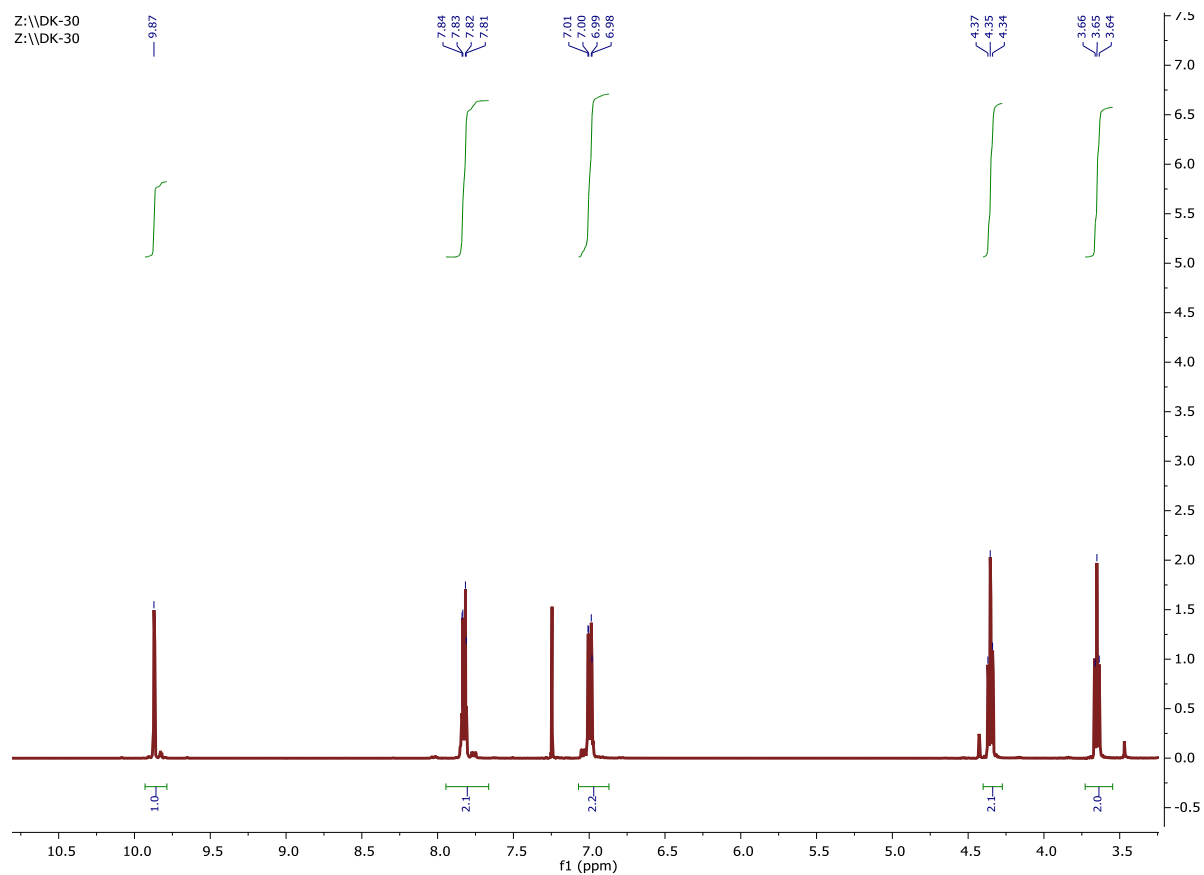

**Figure S5:**  $^1\text{H}$  NMR of compound **2a**.

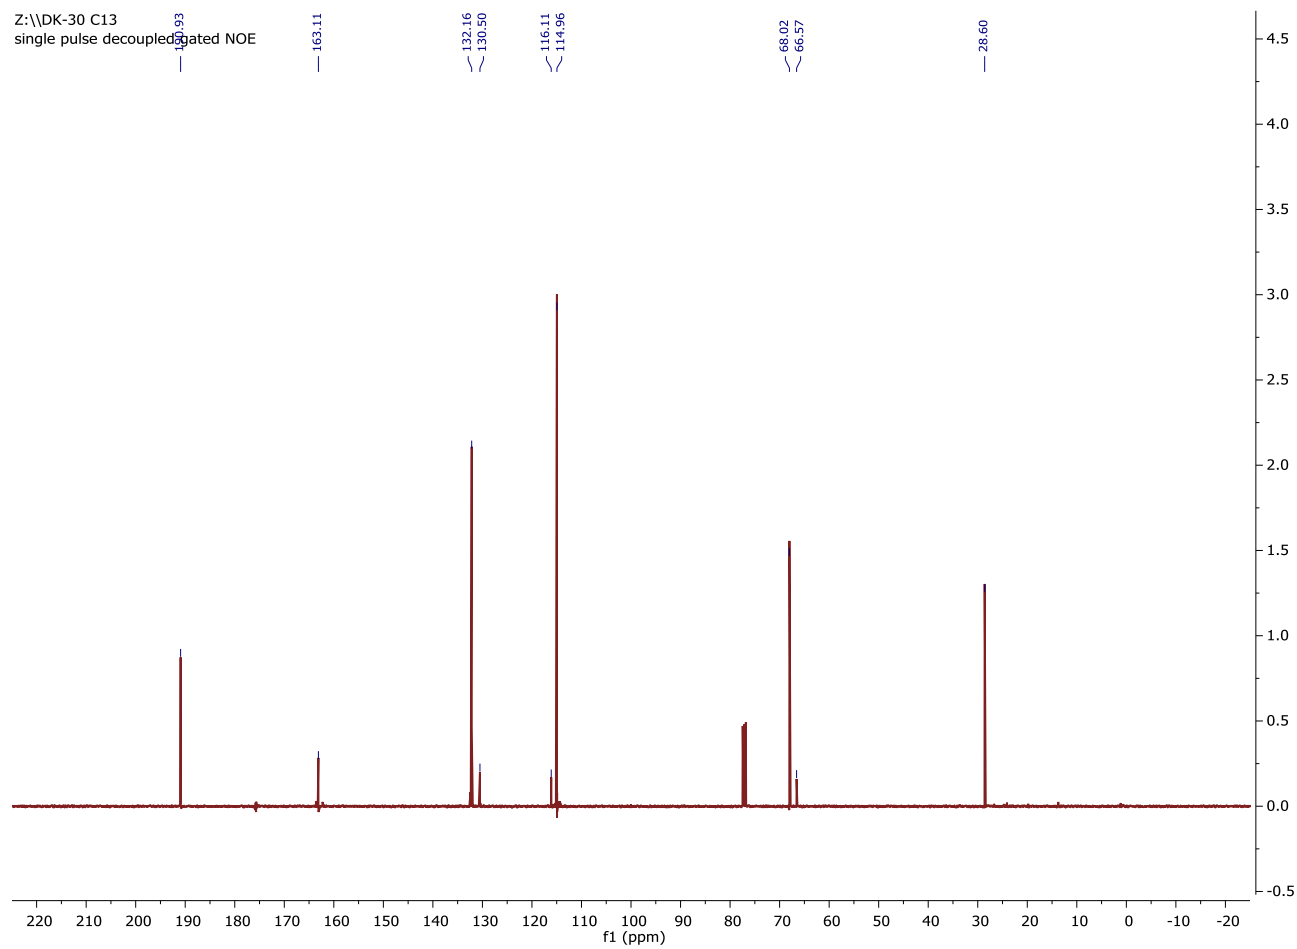

**Figure S6:**  $^{13}\text{C}$  NMR of compound **2a**.

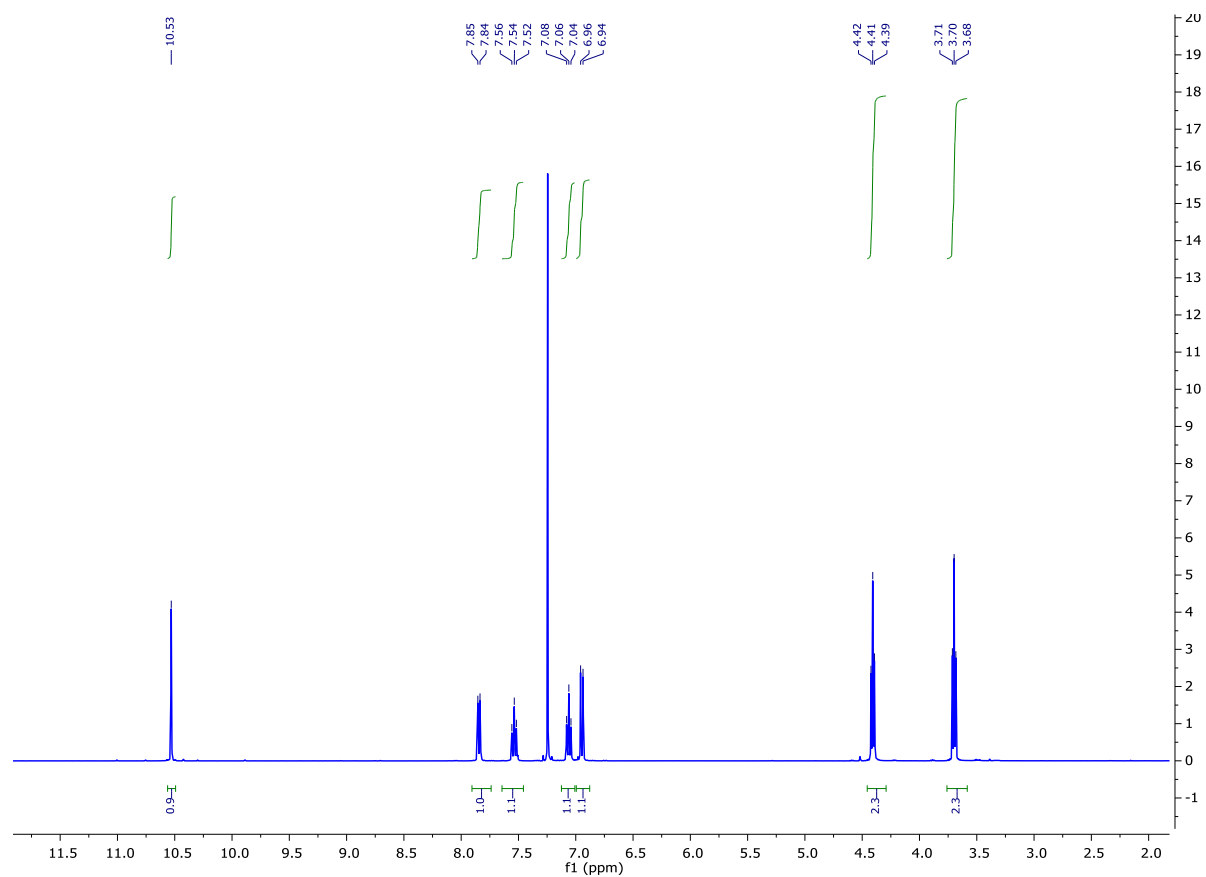

**Figure S7:** <sup>1</sup>H NMR of compound 2b.

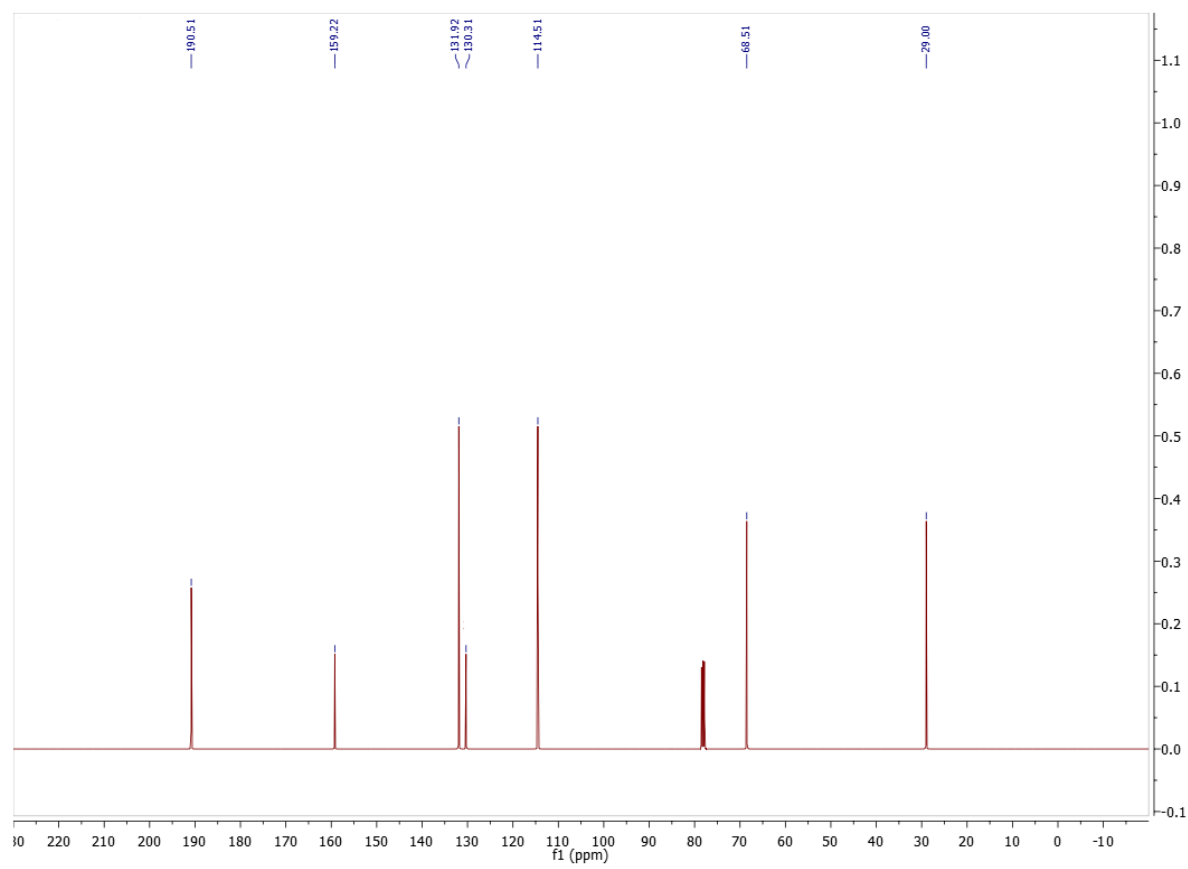

**Figure S8:**  $^{13}\text{C}$  NMR of compound **2b**.



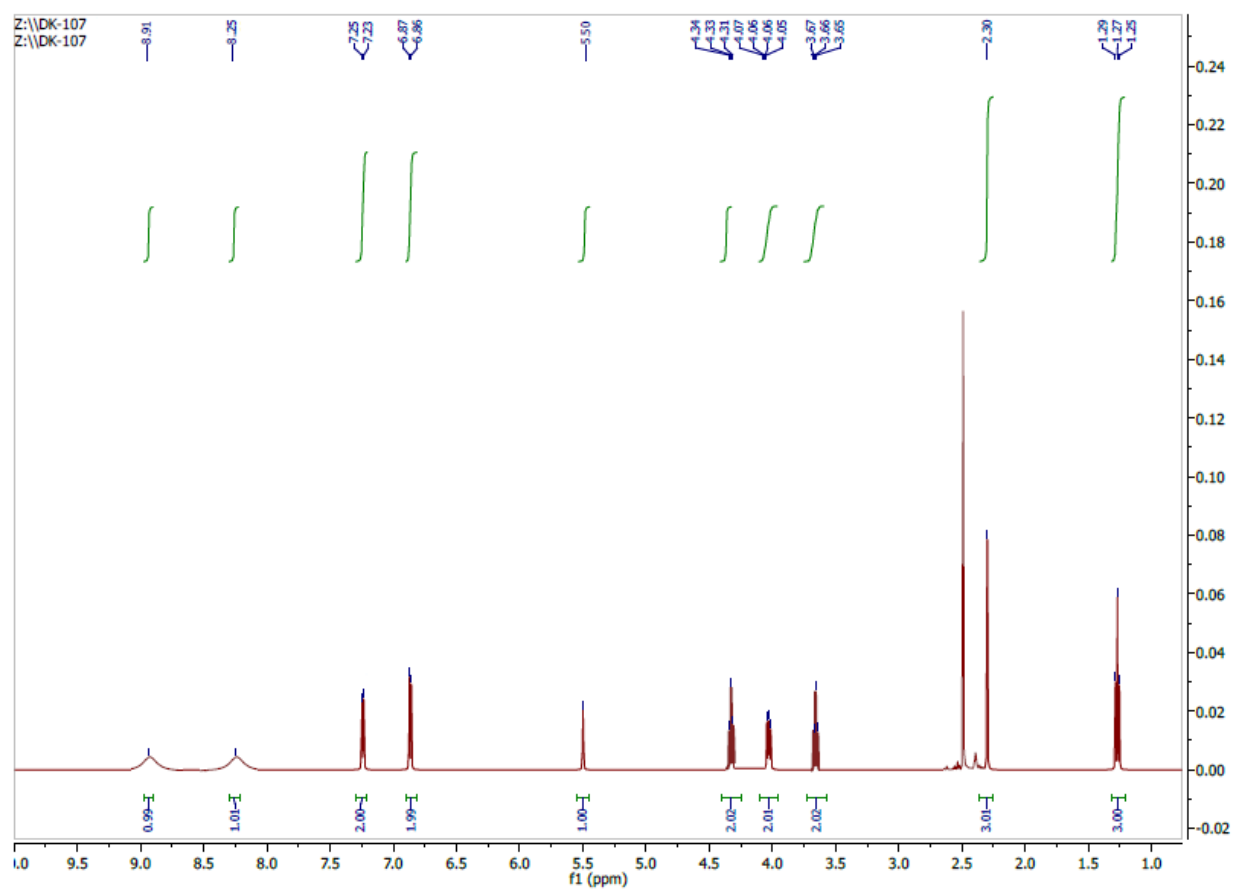

**Figure S9:**  $^1\text{H}$  NMR of compound **3a**.

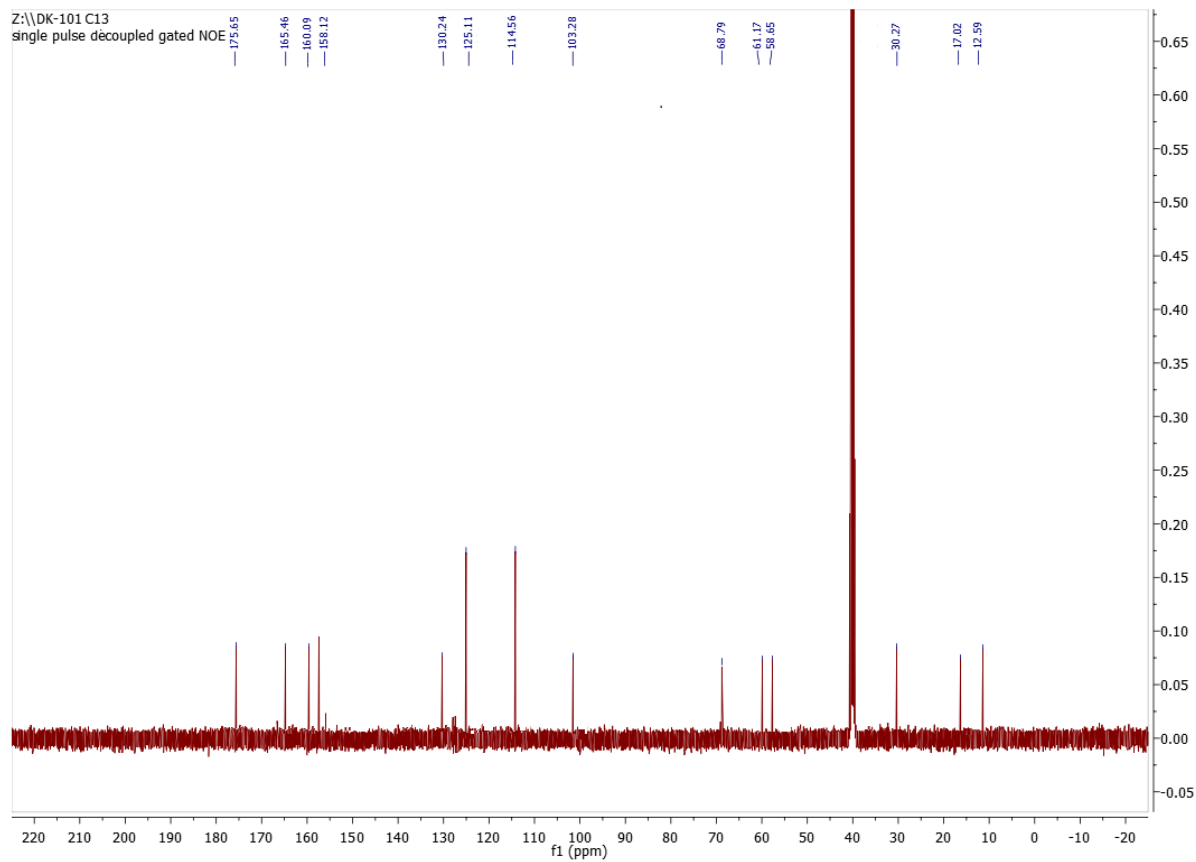

**Figure S10:**  $^{13}\text{C}$  NMR of compound **3a**.

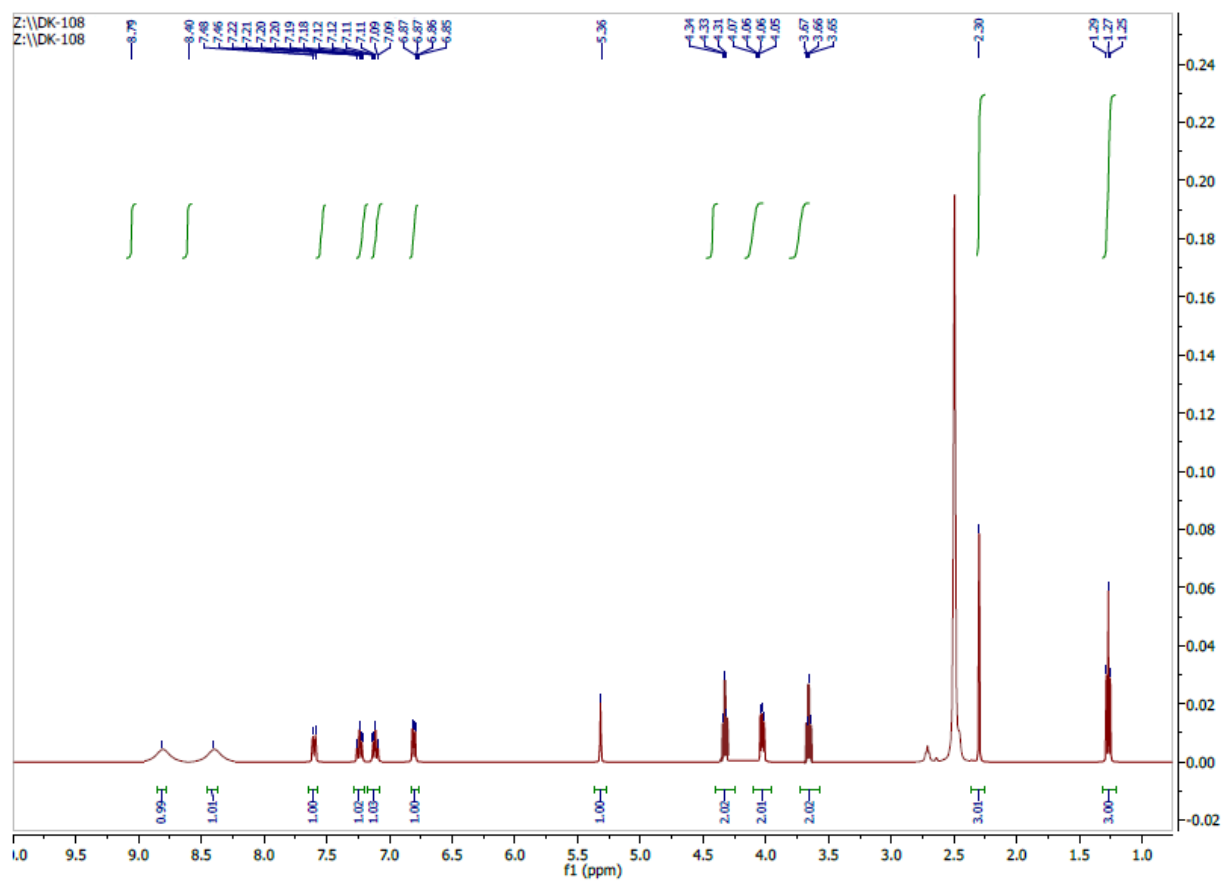

**Figure S11:**  $^1\text{H}$  NMR of compound **3b**.

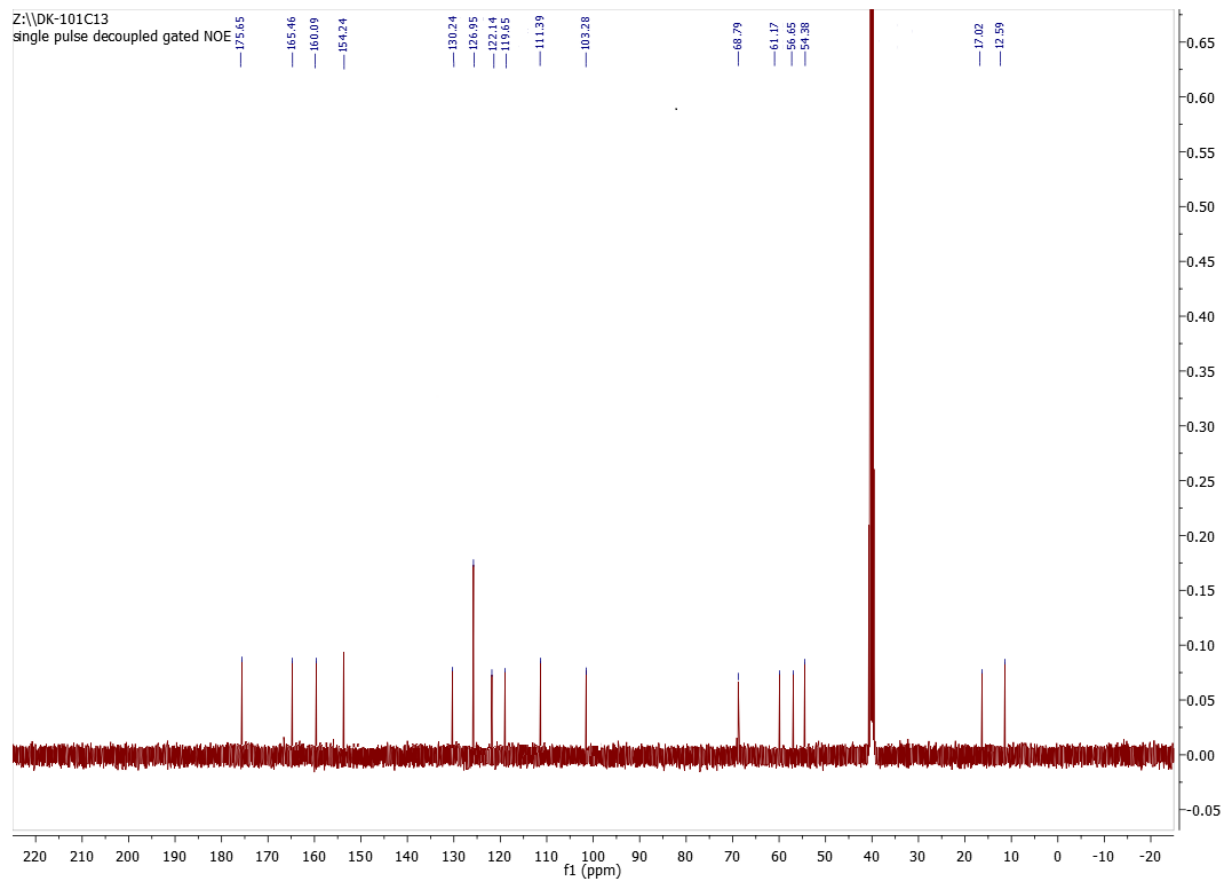

**Figure S12:**  $^{13}\text{C}$  NMR of compound **3b**.

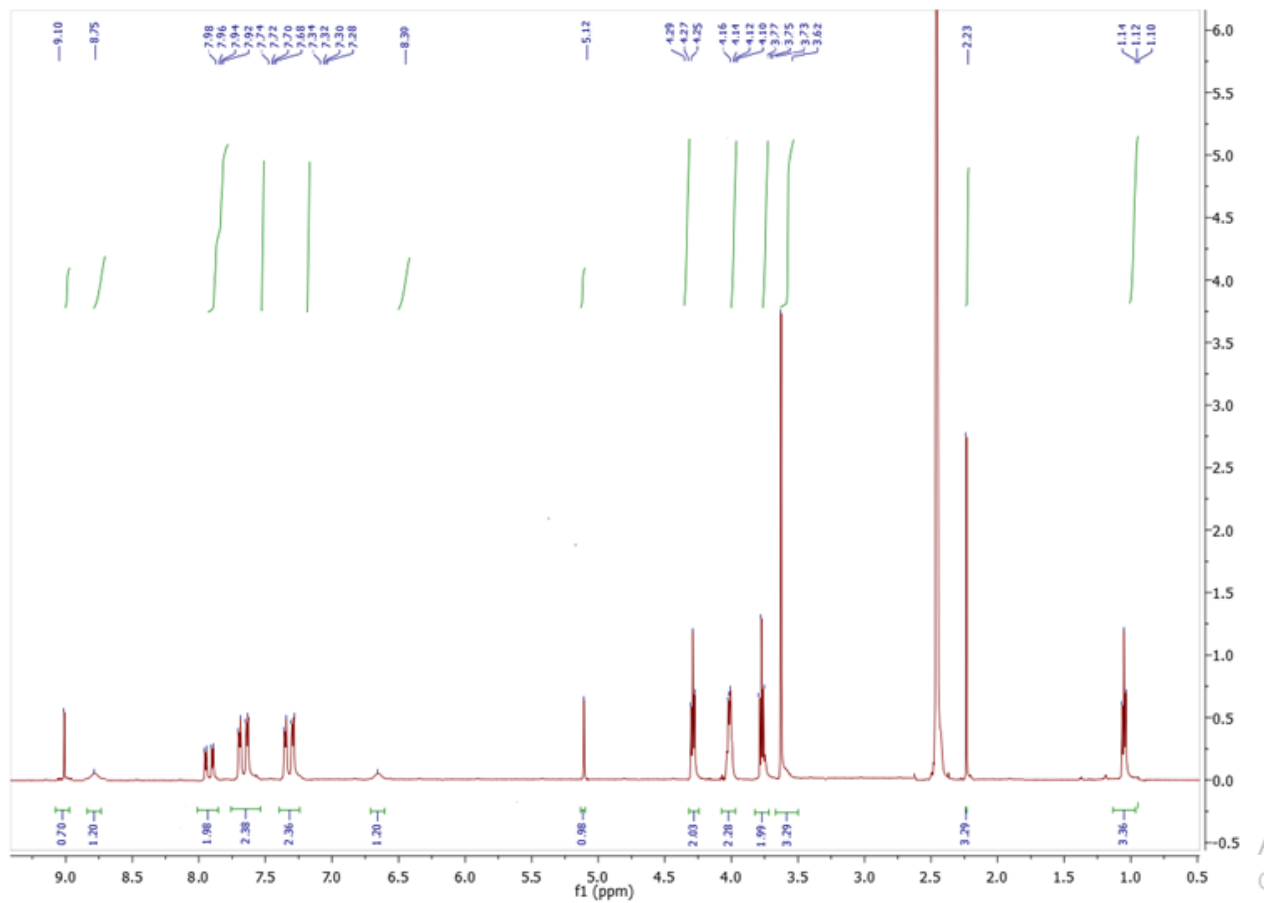

**Figure S13:**  $^1\text{H}$  NMR of compound **IL-1a**.

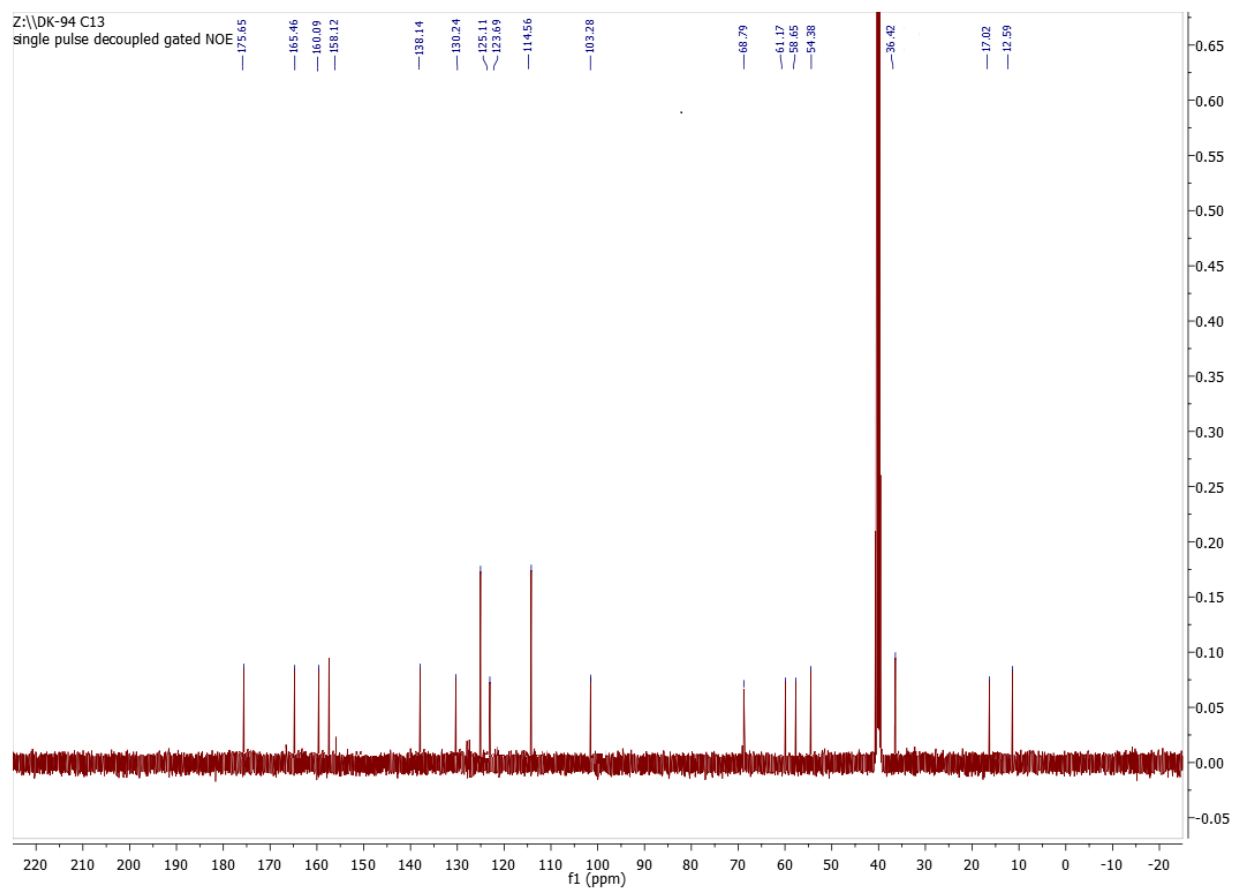

**Figure S14:**  $^{13}\text{C}$  NMR of compound **IL-1a**.

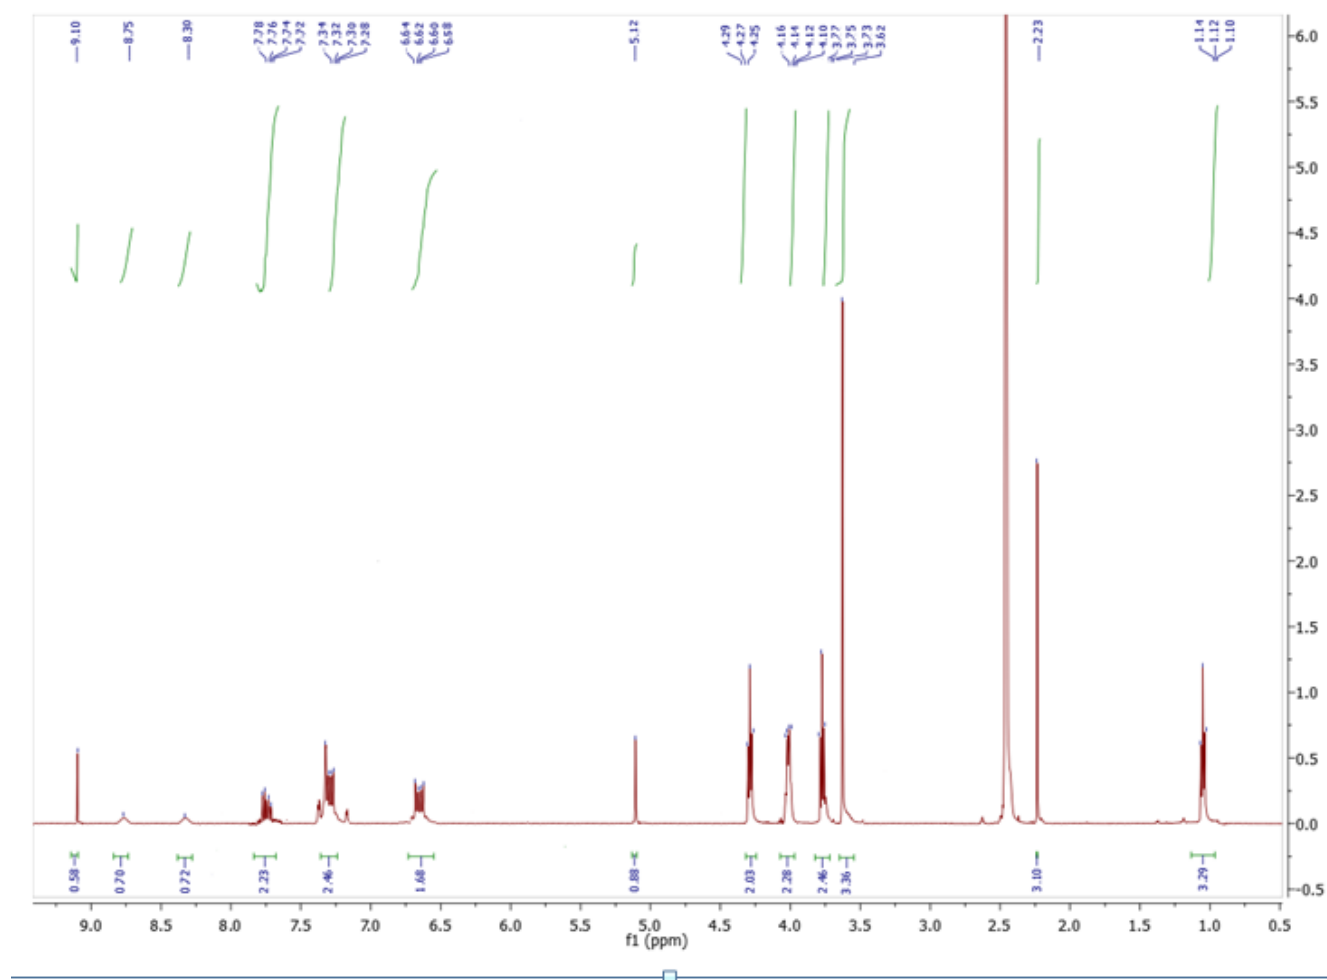

Figure S15: <sup>1</sup>H NMR of compound IL-1b.

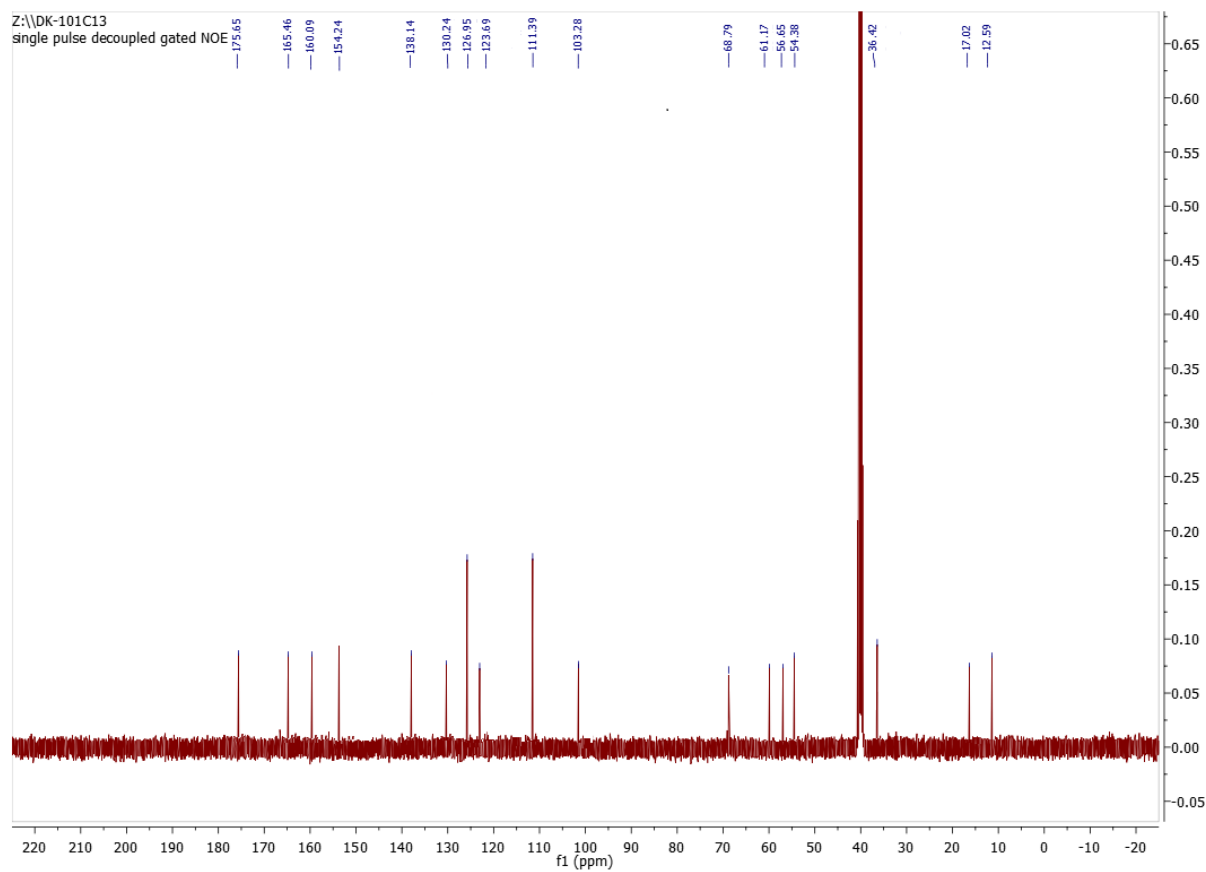

**Figure S16:**  $^{13}\text{C}$  NMR of compound **IL-1b**.



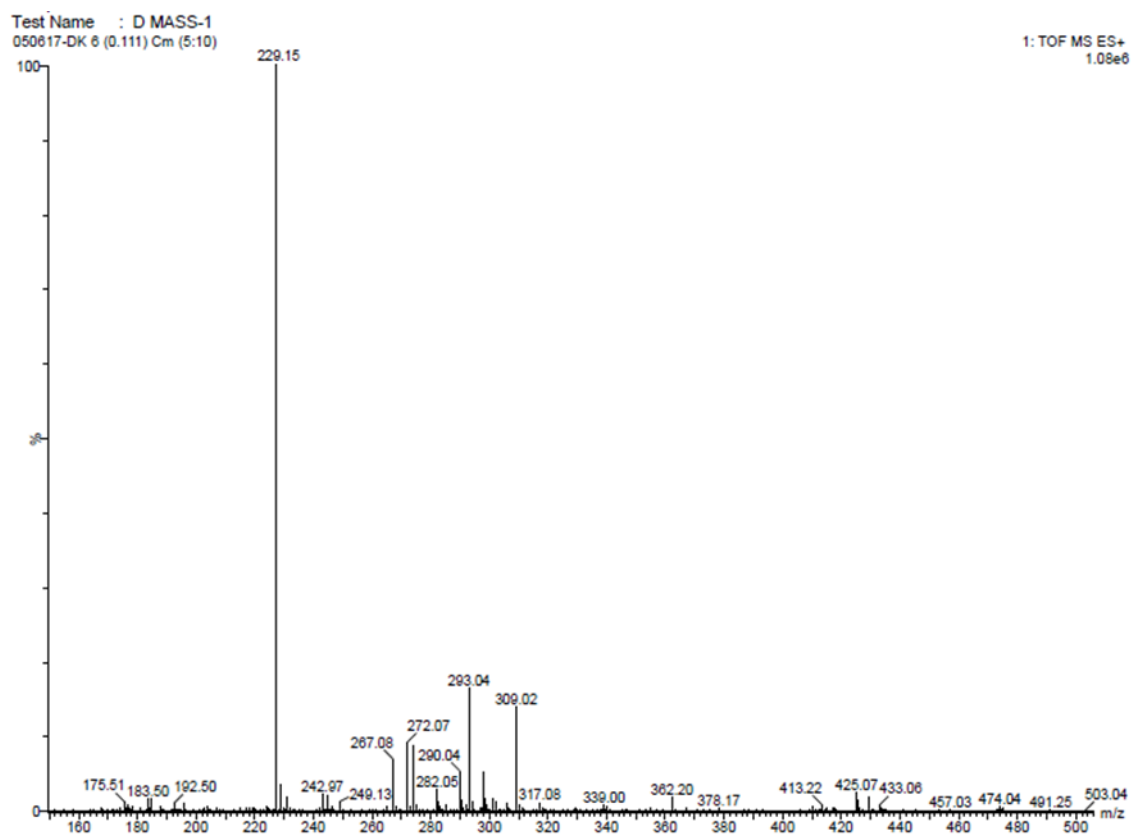

**Figure S17:** Mass spectrum of compound **2a**.

Test Name : D MASS-1  
300517-DK 6 (0.111) Cm (5:10)

1: TOF MS ES+  
1.08e6

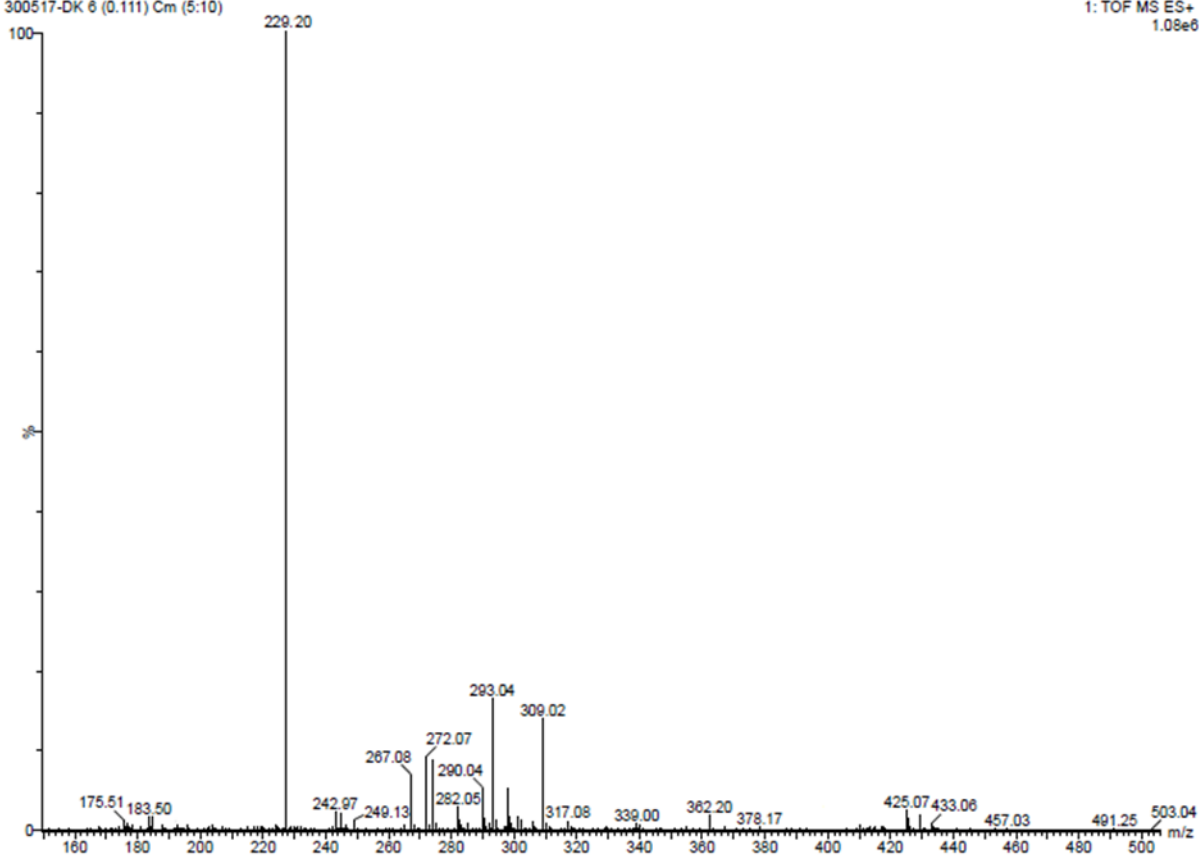

**Figure S18:** Mass spectrum of compound 2b.

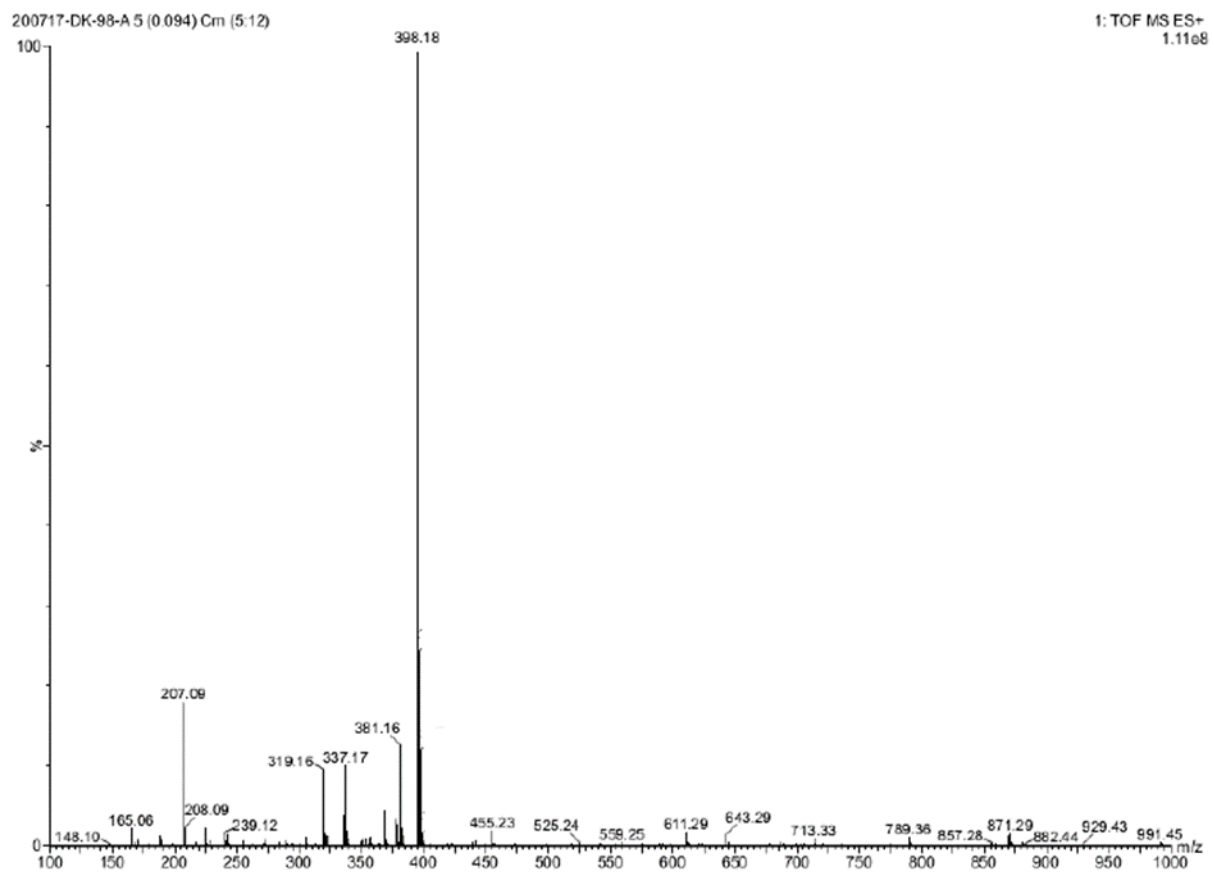

**Figure S19:** Mass spectrum of compound **3a**.

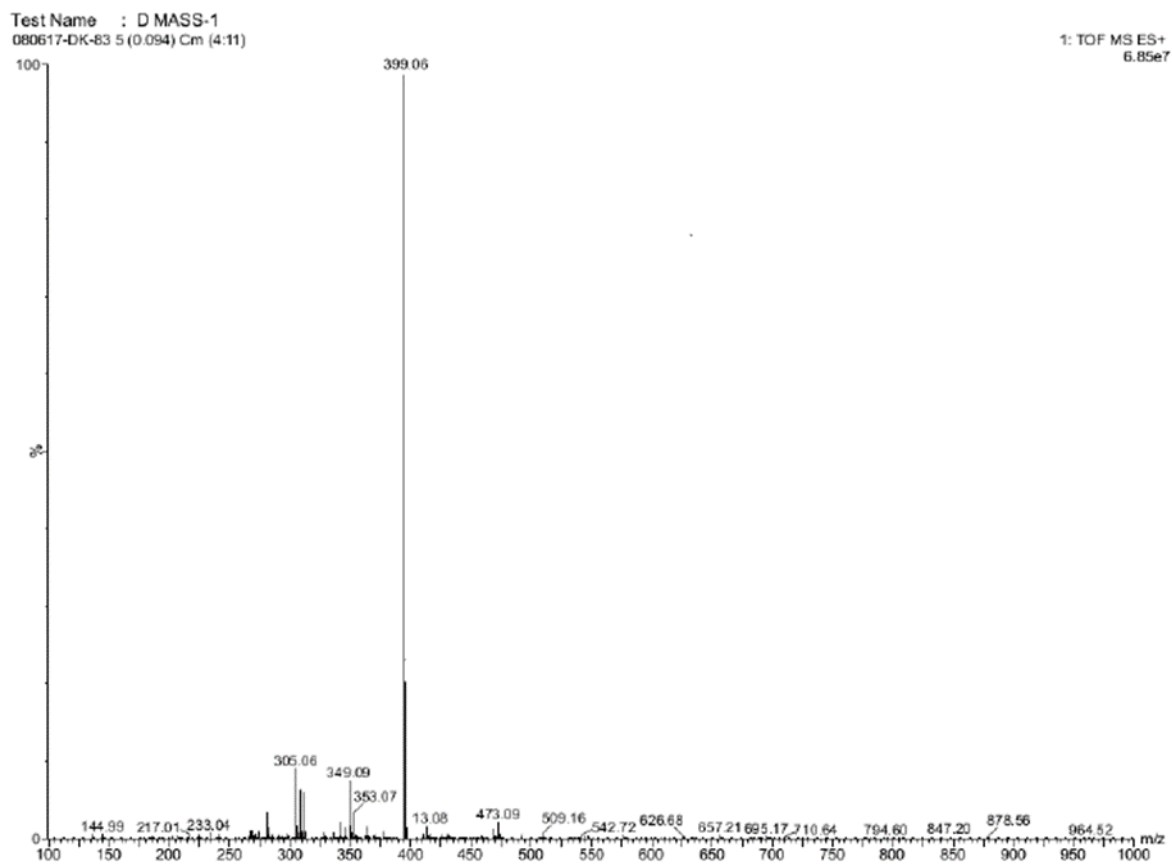

**Figure S20:** Mass spectrum of compound **3b**.

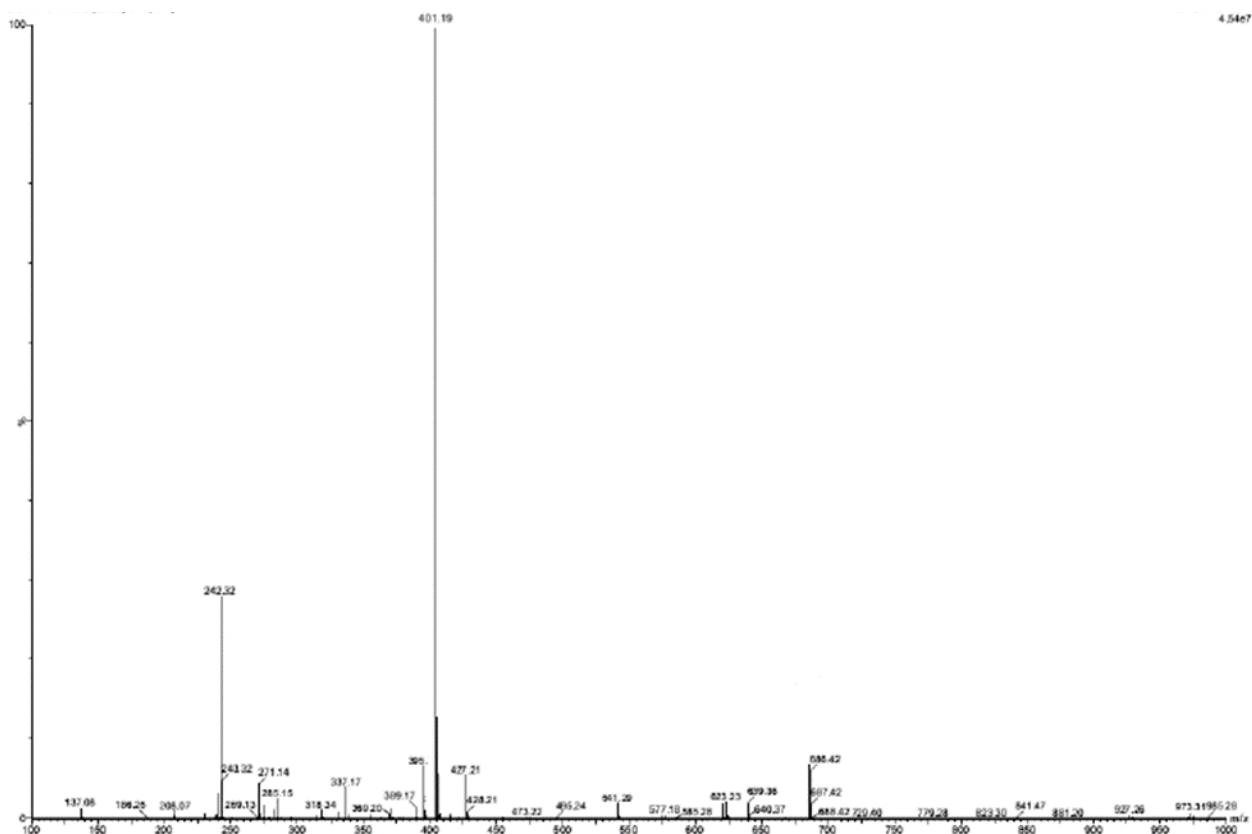

**Figure S21:** Mass spectrum of compound IL-1a.

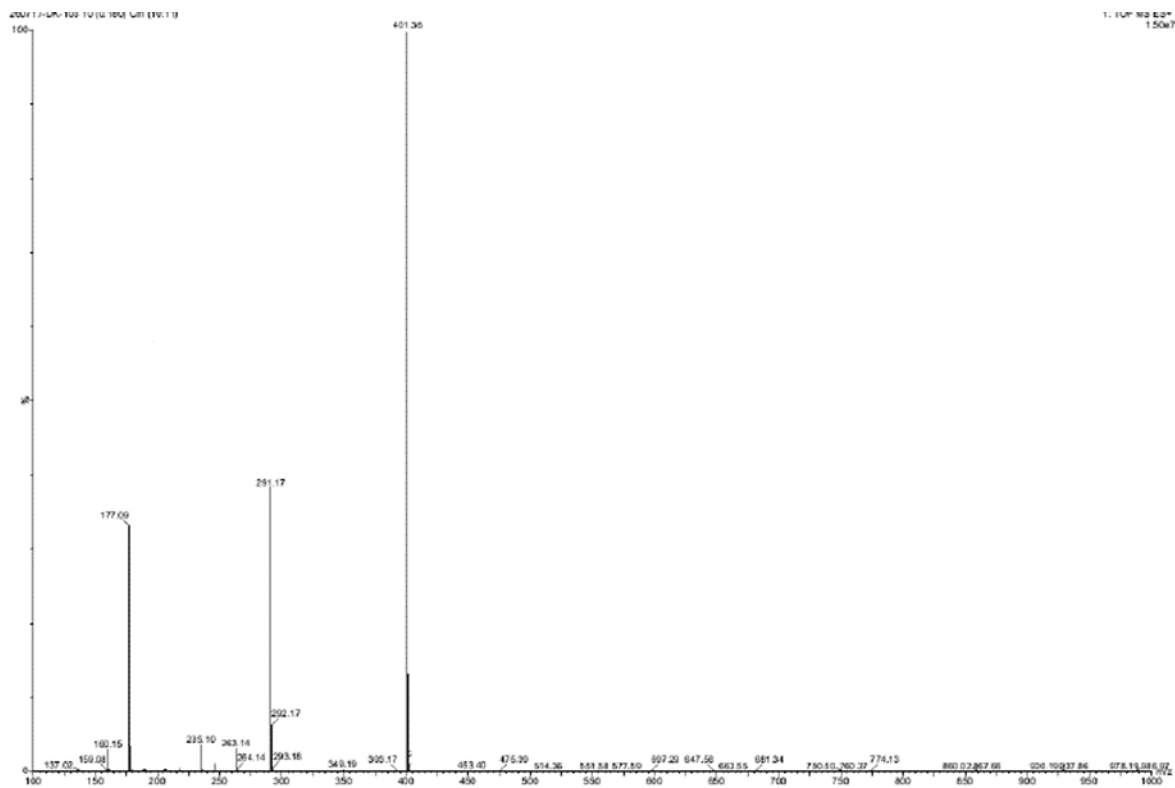

**Figure S22:** Mass spectrum of compound **IL-1b**.
